# Supplementary material for: Avoidable Mortality between Metropolitan and Non-Metropolitan Areas in Korea from 1995 to 2019: A Descriptive Study of Implications for the National Healthcare Policy
Source: MDPI journal article supplement (doi:10.3390/ijerph19063475), 2022-03-15
Supplement: s1 [file s1]

**Supplementary Table S1.** Age standardized all-cause mortality rates per 100,000 persons (95% confidence interval) of metropolitan and non-metropolitan areas by sex from 1995 to 2019

| Year | Total                 |                       |                       | Male                    |                       |                          | Female                |                       |                       |
|------|-----------------------|-----------------------|-----------------------|-------------------------|-----------------------|--------------------------|-----------------------|-----------------------|-----------------------|
|      | All-area              | Metropolitan          | Non-metropolitan      | All-area                | Metropolitan          | Non-metropolitan         | All-area              | Metropolitan          | Non-metropolitan      |
| 1995 | 733.1 (680.0 - 786.1) | 654.2 (604.1 - 704.3) | 786.2 (731.2 - 841.2) | 1020.8 (958.2 - 1083.4) | 878.9 (820.8 - 937.0) | 1115.8 (1050.3 - 1181.3) | 526.0 (481.1 - 571.0) | 492.8 (449.3 - 536.4) | 547.6 (501.8 - 593.5) |
| 1996 | 704.7 (652.6 - 756.7) | 635.4 (586.0 - 684.8) | 752.6 (698.8 - 806.4) | 980.7 (919.3 - 1042.1)  | 856.9 (799.5 - 914.3) | 1065.6 (1001.6 - 1129.5) | 504.6 (460.6 - 548.6) | 475.3 (432.6 - 518.1) | 524.5 (479.7 - 569.4) |
| 1997 | 704.2 (652.2 - 756.2) | 632.7 (583.4 - 682.0) | 753.9 (700.1 - 807.7) | 972.1 (911.0 - 1033.2)  | 844.0 (787.1 - 900.9) | 1060.2 (996.4 - 1124.0)  | 508.7 (464.5 - 552.9) | 477.8 (435.0 - 520.7) | 529.8 (484.7 - 574.9) |
| 1998 | 683.1 (631.9 - 734.4) | 620.9 (572.1 - 669.8) | 727.3 (674.5 - 780.2) | 943.4 (883.2 - 1003.6)  | 829.6 (773.2 - 886.1) | 1023.0 (960.3 - 1085.7)  | 492.4 (448.9 - 535.9) | 467.1 (424.8 - 509.5) | 510.4 (466.2 - 554.7) |
| 1999 | 665.7 (615.1 - 716.3) | 600.9 (552.8 - 648.9) | 711.2 (658.9 - 763.5) | 911.5 (852.3 - 970.7)   | 798.8 (743.4 - 854.2) | 990.4 (928.7 - 1052.1)   | 484.3 (441.2 - 527.5) | 453.3 (411.6 - 495.1) | 505.5 (461.4 - 549.5) |
| 2000 | 646.1 (596.3 - 696.0) | 591.3 (543.6 - 638.9) | 685.4 (634.1 - 736.7) | 881.0 (822.8 - 939.2)   | 778.5 (723.8 - 833.2) | 953.3 (892.7 - 1013.8)   | 471.7 (429.1 - 514.2) | 448.9 (407.4 - 490.4) | 487.9 (444.6 - 531.2) |
| 2001 | 611.5 (563.0 - 659.9) | 561.5 (515.1 - 608.0) | 647.8 (597.9 - 697.7) | 834.8 (778.2 - 891.4)   | 744.6 (691.2 - 798.1) | 899.7 (840.9 - 958.5)    | 445.0 (403.6 - 486.3) | 422.6 (382.3 - 462.9) | 461.1 (419.0 - 503.2) |
| 2002 | 597.3 (549.4 - 645.2) | 549.2 (503.3 - 595.1) | 632.8 (583.5 - 682.1) | 810.0 (754.2 - 865.8)   | 722.1 (669.4 - 774.8) | 874.0 (816.0 - 931.9)    | 438.4 (397.4 - 479.5) | 416.5 (376.5 - 456.5) | 454.6 (412.8 - 496.4) |
| 2003 | 569.3 (522.6 - 616.1) | 519.3 (474.7 - 564.0) | 606.4 (558.1 - 654.7) | 773.4 (718.9 - 827.9)   | 687.2 (635.8 - 738.5) | 837.0 (780.3 - 893.7)    | 415.5 (375.5 - 455.4) | 390.0 (351.3 - 428.7) | 434.0 (393.1 - 474.8) |
| 2004 | 546.6 (500.8 - 592.5) | 503.0 (459.0 - 547.0) | 579.6 (532.4 - 626.8) | 746.4 (692.8 - 799.9)   | 667.7 (617.1 - 718.4) | 805.4 (749.7 - 861.0)    | 395.8 (356.8 - 434.8) | 376.0 (338.0 - 414.0) | 410.7 (371.0 - 450.4) |
| 2005 | 524.0 (479.2 - 568.9) | 485.4 (442.2 - 528.5) | 553.4 (507.3 - 599.5) | 714.2 (661.8 - 766.5)   | 647.9 (598.0 - 697.8) | 764.6 (710.4 - 818.8)    | 381.7 (343.4 - 420.0) | 361.6 (324.3 - 398.8) | 396.3 (357.3 - 435.4) |
| 2006 | 499.4 (455.6 - 543.2) | 462.3 (420.1 - 504.4) | 527.9 (482.9 - 572.9) | 683.6 (632.4 - 734.9)   | 617.8 (569.1 - 666.5) | 733.8 (680.7 - 786.9)    | 361.1 (323.9 - 398.4) | 342.7 (306.5 - 379.0) | 374.9 (336.9 - 412.8) |
| 2007 | 481.9 (438.9 - 525.0) | 445.3 (403.9 - 486.6) | 510.6 (466.3 - 554.8) | 659.4 (609.1 - 709.7)   | 597.3 (549.4 - 645.2) | 707.8 (655.6 - 759.9)    | 349.6 (313.0 - 386.3) | 330.6 (294.9 - 366.2) | 364.0 (326.6 - 401.4) |
| 2008 | 458.6 (416.6 - 500.6) | 419.2 (379.0 - 459.3) | 489.3 (445.9 - 532.6) | 634.5 (585.1 - 683.8)   | 567.0 (520.3 - 613.7) | 687.1 (635.7 - 738.4)    | 327.7 (292.3 - 363.2) | 307.5 (273.2 - 341.9) | 342.7 (306.4 - 379.0) |
| 2009 | 438.8 (397.7 - 479.9) | 403.3 (364.0 - 442.7) | 466.9 (424.6 - 509.3) | 606.4 (558.2 - 654.7)   | 547.4 (501.5 - 593.2) | 653.1 (603.1 - 703.2)    | 312.5 (277.9 - 347.2) | 293.0 (259.4 - 326.5) | 327.6 (292.1 - 363.0) |
| 2010 | 432.1 (391.4 - 472.8) | 399.9 (360.7 - 439.1) | 457.8 (415.9 - 499.7) | 598.6 (550.7 - 646.6)   | 541.9 (496.3 - 587.5) | 643.8 (594.0 - 693.5)    | 305.8 (271.5 - 340.1) | 290.0 (256.6 - 323.3) | 317.9 (282.9 - 352.8) |
| 2011 | 415.6 (375.6 - 455.5) | 385.5 (347.0 - 424.0) | 440.1 (398.9 - 481.2) | 575.7 (528.7 - 622.8)   | 522.7 (477.9 - 567.5) | 618.5 (569.7 - 667.2)    | 293.3 (259.7 - 326.8) | 278.5 (245.8 - 311.2) | 305.1 (270.9 - 339.4) |
| 2012 | 409.6 (369.9 - 449.3) | 380.7 (342.5 - 419.0) | 433.3 (392.5 - 474.1) | 564.9 (518.3 - 611.5)   | 515.4 (470.9 - 559.8) | 605.1 (556.9 - 653.3)    | 290.2 (256.8 - 323.6) | 275.0 (242.5 - 307.5) | 302.4 (268.3 - 336.5) |
| 2013 | 388.8 (350.1 - 427.4) | 364.1 (326.7 - 401.5) | 409.3 (369.6 - 448.9) | 533.3 (488.0 - 578.5)   | 488.2 (444.9 - 531.5) | 570.0 (523.2 - 616.8)    | 276.3 (243.7 - 308.9) | 264.8 (233.0 - 296.7) | 285.8 (252.7 - 318.9) |
| 2014 | 371.9 (334.1 - 409.7) | 348.5 (311.9 - 385.1) | 391.8 (353.0 - 430.6) | 509.4 (465.1 - 553.6)   | 466.4 (424.1 - 508.7) | 544.9 (499.1 - 590.6)    | 263.8 (232.0 - 295.7) | 253.1 (222.0 - 284.3) | 273.0 (240.6 - 305.4) |
| 2015 | 363.6 (326.2 - 401.0) | 337.8 (301.8 - 373.9) | 385.1 (346.7 - 423.6) | 494.5 (450.9 - 538.1)   | 450.4 (408.8 - 492.0) | 530.9 (485.8 - 576.1)    | 259.7 (228.1 - 291.2) | 246.0 (215.3 - 276.8) | 270.8 (238.6 - 303.1) |
| 2016 | 352.4 (315.6 - 389.2) | 330.0 (294.4 - 365.7) | 371.5 (333.7 - 409.2) | 476.9 (434.1 - 519.7)   | 436.4 (395.5 - 477.4) | 510.9 (466.6 - 555.3)    | 252.6 (221.4 - 283.7) | 242.6 (212.1 - 273.1) | 260.9 (229.3 - 292.6) |
| 2017 | 339.2 (303.1 - 375.3) | 314.8 (280.1 - 349.6) | 359.9 (322.7 - 397.1) | 457.3 (415.4 - 499.2)   | 417.4 (377.3 - 457.4) | 491.1 (447.6 - 534.5)    | 243.2 (212.6 - 273.7) | 229.7 (200.0 - 259.4) | 254.1 (222.9 - 285.4) |
| 2018 | 337.3 (301.3 - 373.3) | 314.5 (279.8 - 349.3) | 356.9 (319.9 - 393.9) | 452.9 (411.2 - 494.6)   | 416.1 (376.1 - 456.1) | 484.4 (441.3 - 527.5)    | 242.5 (212.0 - 273.1) | 229.6 (199.9 - 259.3) | 253.4 (222.2 - 284.6) |
| 2019 | 319.6 (284.5 - 354.6) | 296.9 (263.1 - 330.6) | 339.3 (303.2 - 375.4) | 429.6 (389.0 - 470.2)   | 393.8 (354.9 - 432.7) | 460.7 (418.7 - 502.8)    | 228.7 (199.1 - 258.4) | 215.6 (186.9 - 244.4) | 239.6 (209.3 - 269.9) |

**Supplementary Table S2.** Age standardized avoidable mortality rates per 100,000 persons (95% confidence interval) of metropolitan and non-metropolitan areas by sex from 1995 to 2019

| Year | Total                 |                       |                       | Male                  |                       |                       | Female                |                       |                       |
|------|-----------------------|-----------------------|-----------------------|-----------------------|-----------------------|-----------------------|-----------------------|-----------------------|-----------------------|
|      | All-area              | Metropolitan          | Non-metropolitan      | All-area              | Metropolitan          | Non-metropolitan      | All-area              | Metropolitan          | Non-metropolitan      |
| 1995 | 350.5 (313.8 - 387.2) | 308.9 (274.4 - 343.3) | 381.5 (343.2 - 419.8) | 525.4 (480.5 - 570.4) | 449.0 (407.5 - 490.5) | 581.7 (534.5 - 629.0) | 204.9 (176.8 - 232.9) | 193.4 (166.1 - 220.7) | 213.8 (185.2 - 242.5) |
| 1996 | 331.6 (295.9 - 367.3) | 290.7 (257.3 - 324.1) | 362.5 (325.2 - 399.8) | 497.1 (453.4 - 540.8) | 423.5 (383.2 - 463.8) | 551.7 (505.6 - 597.7) | 193.2 (166.0 - 220.5) | 180.0 (153.7 - 206.3) | 203.8 (175.8 - 231.8) |
| 1997 | 327.3 (291.8 - 362.7) | 287.6 (254.4 - 320.8) | 357.5 (320.4 - 394.6) | 487.7 (444.5 - 531.0) | 415.0 (375.1 - 455.0) | 542.2 (496.5 - 587.8) | 192.5 (165.3 - 219.7) | 180.6 (154.3 - 206.9) | 202.1 (174.3 - 230.0) |
| 1998 | 311.2 (276.6 - 345.7) | 274.6 (242.1 - 307.1) | 339.4 (303.3 - 375.5) | 466.4 (424.0 - 508.7) | 398.7 (359.5 - 437.8) | 517.5 (472.9 - 562.1) | 180.3 (154.0 - 206.6) | 169.6 (144.0 - 195.1) | 189.2 (162.2 - 216.2) |
| 1999 | 300.8 (266.8 - 334.7) | 265.9 (233.9 - 297.8) | 327.9 (292.4 - 363.4) | 448.6 (407.1 - 490.1) | 386.7 (348.2 - 425.3) | 496.0 (452.4 - 539.7) | 176.1 (150.1 - 202.1) | 163.6 (138.5 - 188.7) | 186.0 (159.2 - 212.7) |
| 2000 | 295.0 (261.3 - 328.6) | 264.3 (232.4 - 296.1) | 319.3 (284.3 - 354.3) | 438.4 (397.4 - 479.5) | 381.3 (343.0 - 419.6) | 482.7 (439.6 - 525.8) | 173.4 (147.6 - 199.2) | 163.9 (138.8 - 189.0) | 181.5 (155.1 - 207.9) |
| 2001 | 282.6 (249.7 - 315.6) | 253.6 (222.4 - 284.9) | 305.8 (271.5 - 340.0) | 421.5 (381.3 - 461.8) | 369.3 (331.7 - 407.0) | 462.5 (420.3 - 504.6) | 164.8 (139.6 - 190.0) | 153.9 (129.6 - 178.2) | 173.8 (148.0 - 199.6) |
| 2002 | 278.0 (245.3 - 310.7) | 248.2 (217.4 - 279.1) | 301.9 (267.8 - 336.0) | 412.1 (372.3 - 451.9) | 358.8 (321.7 - 396.0) | 454.3 (412.5 - 496.0) | 163.4 (138.3 - 188.4) | 152.0 (127.8 - 176.1) | 172.7 (146.9 - 198.4) |
| 2003 | 268.1 (236.0 - 300.2) | 239.1 (208.7 - 269.4) | 291.8 (258.3 - 325.3) | 396.9 (357.8 - 435.9) | 345.9 (309.5 - 382.4) | 437.9 (396.9 - 479.0) | 156.5 (132.0 - 181.1) | 144.8 (121.2 - 168.4) | 166.3 (141.0 - 191.6) |
| 2004 | 253.8 (222.6 - 285.1) | 227.6 (198.0 - 257.2) | 275.5 (243.0 - 308.0) | 377.7 (339.6 - 415.8) | 330.2 (294.5 - 365.8) | 416.3 (376.3 - 456.3) | 146.1 (122.4 - 169.7) | 136.7 (113.7 - 159.6) | 154.1 (129.8 - 178.5) |
| 2005 | 237.8 (207.5 - 268.0) | 215.3 (186.5 - 244.0) | 256.5 (225.2 - 287.9) | 351.6 (314.8 - 388.3) | 311.2 (276.7 - 345.8) | 384.8 (346.3 - 423.2) | 138.4 (115.3 - 161.4) | 129.7 (107.4 - 152.1) | 145.6 (121.9 - 169.2) |
| 2006 | 222.0 (192.8 - 251.2) | 200.0 (172.2 - 227.7) | 240.5 (210.1 - 270.9) | 329.8 (294.2 - 365.4) | 291.2 (257.8 - 324.7) | 361.8 (324.6 - 399.1) | 126.9 (104.8 - 149.0) | 117.9 (96.6 - 139.2)  | 134.4 (111.7 - 157.2) |
| 2007 | 211.6 (183.0 - 240.1) | 188.1 (161.2 - 214.9) | 231.6 (201.7 - 261.4) | 310.4 (275.9 - 344.9) | 269.4 (237.2 - 301.6) | 344.9 (308.5 - 381.3) | 123.4 (101.7 - 145.2) | 114.2 (93.3 - 135.2)  | 131.5 (109.0 - 153.9) |
| 2008 | 199.3 (171.6 - 227.0) | 176.0 (150.0 - 202.0) | 219.2 (190.2 - 248.2) | 293.0 (259.4 - 326.5) | 253.0 (221.8 - 284.2) | 326.9 (291.5 - 362.3) | 115.2 (94.2 - 136.2)  | 105.8 (85.6 - 125.9)  | 123.2 (101.4 - 144.9) |
| 2009 | 191.3 (164.2 - 218.5) | 170.2 (144.6 - 195.8) | 209.7 (181.3 - 238.1) | 280.5 (247.7 - 313.4) | 245.3 (214.6 - 275.9) | 310.9 (276.3 - 345.4) | 110.4 (89.8 - 131.0)  | 101.1 (81.4 - 120.8)  | 118.6 (97.2 - 139.9)  |
| 2010 | 184.3 (157.7 - 210.9) | 165.5 (140.3 - 190.7) | 200.8 (173.1 - 228.6) | 270.4 (238.1 - 302.6) | 238.1 (207.9 - 268.4) | 298.5 (264.6 - 332.4) | 105.6 (85.5 - 125.7)  | 98.2 (78.8 - 117.6)   | 112.1 (91.3 - 132.8)  |
| 2011 | 174.5 (148.7 - 200.4) | 156.4 (131.9 - 180.9) | 190.7 (163.6 - 217.7) | 256.7 (225.3 - 288.1) | 225.6 (196.2 - 255.1) | 283.9 (250.9 - 316.9) | 99.1 (79.5 - 118.6)   | 91.9 (73.1 - 110.7)   | 105.5 (85.4 - 125.6)  |
| 2012 | 165.8 (140.5 - 191.0) | 149.2 (125.3 - 173.2) | 180.6 (154.3 - 206.9) | 244.3 (213.6 - 274.9) | 216.8 (188.0 - 245.7) | 268.5 (236.4 - 300.7) | 93.0 (74.1 - 111.9)   | 85.9 (67.8 - 104.1)   | 99.5 (80.0 - 119.1)   |
| 2013 | 157.2 (132.6 - 181.8) | 143.6 (120.1 - 167.0) | 169.6 (144.0 - 195.1) | 230.1 (200.3 - 259.8) | 207.2 (179.0 - 235.4) | 250.4 (219.4 - 281.4) | 89.2 (70.7 - 107.7)   | 83.6 (65.7 - 101.5)   | 94.5 (75.4 - 113.5)   |
| 2014 | 150.0 (126.0 - 174.0) | 136.4 (113.5 - 159.3) | 162.5 (137.5 - 187.5) | 219.3 (190.3 - 248.3) | 197.2 (169.7 - 224.7) | 239.3 (208.9 - 269.6) | 84.9 (66.8 - 102.9)   | 78.9 (61.5 - 96.4)    | 90.5 (71.9 - 109.2)   |
| 2015 | 143.2 (119.7 - 166.6) | 129.4 (107.1 - 151.7) | 155.8 (131.3 - 180.2) | 208.5 (180.2 - 236.8) | 186.7 (159.9 - 213.4) | 228.2 (198.6 - 257.8) | 81.5 (63.8 - 99.2)    | 75.2 (58.2 - 92.2)    | 87.4 (69.1 - 105.7)   |
| 2016 | 136.9 (114.0 - 159.9) | 124.3 (102.5 - 146.2) | 148.6 (124.7 - 172.5) | 199.2 (171.5 - 226.8) | 179.0 (152.8 - 205.3) | 217.6 (188.7 - 246.5) | 78.0 (60.7 - 95.3)    | 72.7 (56.0 - 89.4)    | 82.9 (65.1 - 100.8)   |
| 2017 | 128.3 (106.1 - 150.5) | 116.7 (95.5 - 137.8)  | 139.2 (116.1 - 162.4) | 187.6 (160.7 - 214.4) | 169.7 (144.2 - 195.2) | 204.1 (176.1 - 232.1) | 71.7 (55.1 - 88.3)    | 66.4 (50.4 - 82.4)    | 76.7 (59.5 - 93.9)    |
| 2018 | 124.9 (103.0 - 146.8) | 113.4 (92.5 - 134.2)  | 136.0 (113.1 - 158.8) | 181.6 (155.2 - 208.0) | 164.6 (139.4 - 189.7) | 197.6 (170.1 - 225.2) | 70.4 (54.0 - 86.9)    | 64.7 (49.0 - 80.5)    | 76.0 (58.9 - 93.1)    |
| 2019 | 120.2 (98.7 - 141.7)  | 109.6 (89.1 - 130.1)  | 130.4 (108.0 - 152.8) | 173.4 (147.6 - 199.2) | 157.3 (132.7 - 181.9) | 188.7 (161.8 - 215.6) | 68.8 (52.6 - 85.1)    | 64.2 (48.5 - 79.9)    | 73.5 (56.7 - 90.2)    |

**Supplementary Table S3.** Age standardized preventable mortality rates per 100,000 persons (95% confidence interval) of metropolitan and non-metropolitan areas by sex from 1995 to 2019

| Year | Total                 |                       |                       | Male                  |                       |                       | Female                |                      |                       |
|------|-----------------------|-----------------------|-----------------------|-----------------------|-----------------------|-----------------------|-----------------------|----------------------|-----------------------|
|      | All-area              | Metropolitan          | Non-metropolitan      | All-area              | Metropolitan          | Non-metropolitan      | All-area              | Metropolitan         | Non-metropolitan      |
| 1995 | 258.0 (226.6 - 289.5) | 219.8 (190.8 - 248.9) | 286.3 (253.1 - 319.5) | 407.2 (367.7 - 446.8) | 337.7 (301.6 - 373.7) | 458.3 (416.3 - 500.2) | 131.9 (109.4 - 154.4) | 120.7 (99.2 - 142.3) | 140.1 (116.9 - 163.3) |
| 1996 | 246.0 (215.3 - 276.8) | 209.3 (181.0 - 237.7) | 273.6 (241.2 - 306.0) | 388.9 (350.3 - 427.6) | 324.0 (288.7 - 359.3) | 437.4 (396.4 - 478.4) | 124.6 (102.7 - 146.4) | 112.2 (91.4 - 132.9) | 134.0 (111.3 - 156.7) |
| 1997 | 240.4 (210.0 - 270.8) | 205.0 (176.9 - 233.0) | 267.2 (235.1 - 299.2) | 377.6 (339.5 - 415.7) | 314.4 (279.6 - 349.1) | 425.0 (384.6 - 465.4) | 123.4 (101.6 - 145.2) | 111.6 (90.9 - 132.3) | 132.4 (109.8 - 155.0) |
| 1998 | 225.0 (195.6 - 254.4) | 191.9 (164.8 - 219.1) | 250.2 (219.2 - 281.2) | 355.1 (318.2 - 392.0) | 295.3 (261.6 - 329.0) | 400.1 (360.9 - 439.3) | 113.7 (92.8 - 134.7)  | 103.1 (83.2 - 123.0) | 122.1 (100.5 - 143.8) |
| 1999 | 215.8 (187.0 - 244.6) | 184.7 (158.1 - 211.4) | 239.7 (209.4 - 270.0) | 340.0 (303.8 - 376.1) | 285.1 (252.0 - 318.2) | 381.8 (343.5 - 420.1) | 109.6 (89.1 - 130.1)  | 98.4 (79.0 - 117.8)  | 118.2 (96.9 - 139.5)  |
| 2000 | 210.0 (181.6 - 238.4) | 182.4 (156.0 - 208.9) | 231.5 (201.7 - 261.3) | 330.7 (295.0 - 366.3) | 280.8 (247.9 - 313.6) | 369.1 (331.5 - 406.8) | 106.6 (86.4 - 126.9)  | 97.2 (77.9 - 116.5)  | 114.1 (93.1 - 135.0)  |
| 2001 | 200.6 (172.8 - 228.4) | 174.4 (148.5 - 200.2) | 221.3 (192.1 - 250.4) | 316.3 (281.5 - 351.2) | 269.3 (237.2 - 301.5) | 352.9 (316.1 - 389.7) | 101.3 (81.5 - 121.0)  | 91.4 (72.6 - 110.1)  | 109.2 (88.7 - 129.7)  |
| 2002 | 198.6 (171.0 - 226.3) | 171.6 (145.9 - 197.2) | 220.0 (190.9 - 249.1) | 312.2 (277.6 - 346.9) | 264.0 (232.1 - 295.8) | 350.1 (313.4 - 386.8) | 100.6 (80.9 - 120.2)  | 90.2 (71.6 - 108.8)  | 108.7 (88.3 - 129.2)  |
| 2003 | 194.5 (167.1 - 221.8) | 167.8 (142.4 - 193.2) | 215.9 (187.1 - 244.7) | 304.1 (269.9 - 338.3) | 257.8 (226.3 - 289.2) | 341.1 (304.9 - 377.3) | 98.7 (79.2 - 118.1)   | 87.6 (69.3 - 106.0)  | 107.5 (87.2 - 127.9)  |
| 2004 | 184.1 (157.5 - 210.7) | 160.3 (135.5 - 185.1) | 203.4 (175.4 - 231.4) | 290.1 (256.7 - 323.5) | 246.8 (216.0 - 277.6) | 324.9 (289.6 - 360.2) | 91.0 (72.3 - 109.7)   | 82.7 (64.9 - 100.6)  | 97.8 (78.5 - 117.2)   |
| 2005 | 173.4 (147.6 - 199.2) | 153.6 (129.3 - 177.9) | 189.7 (162.7 - 216.7) | 270.8 (238.5 - 303.0) | 234.8 (204.8 - 264.9) | 300.1 (266.1 - 334.0) | 87.6 (69.3 - 105.9)   | 80.4 (62.8 - 98.0)   | 93.5 (74.5 - 112.4)   |
| 2006 | 160.9 (136.1 - 185.8) | 141.5 (118.2 - 164.8) | 177.1 (151.0 - 203.2) | 252.8 (221.6 - 283.9) | 218.3 (189.4 - 247.3) | 281.3 (248.4 - 314.1) | 79.3 (61.9 - 96.8)    | 71.8 (55.2 - 88.5)   | 85.5 (67.4 - 103.6)   |
| 2007 | 153.9 (129.6 - 178.2) | 133.6 (111.0 - 156.3) | 171.0 (145.4 - 196.6) | 238.2 (208.0 - 268.5) | 202.5 (174.6 - 230.4) | 268.2 (236.1 - 300.3) | 78.1 (60.8 - 95.5)    | 70.7 (54.2 - 87.2)   | 84.5 (66.5 - 102.5)   |
| 2008 | 145.9 (122.2 - 169.5) | 126.4 (104.4 - 148.5) | 162.4 (137.4 - 187.4) | 225.9 (196.4 - 255.3) | 192.1 (164.9 - 219.2) | 254.6 (223.3 - 285.8) | 73.4 (56.6 - 90.2)    | 66.1 (50.1 - 82.0)   | 79.5 (62.0 - 96.9)    |
| 2009 | 141.7 (118.4 - 165.1) | 124.1 (102.3 - 146.0) | 157.0 (132.4 - 181.6) | 218.5 (189.5 - 247.5) | 188.7 (161.8 - 215.6) | 244.1 (213.5 - 274.8) | 71.5 (54.9 - 88.1)    | 64.3 (48.6 - 80.0)   | 77.8 (60.5 - 95.1)    |
| 2010 | 135.9 (113.0 - 158.7) | 120.1 (98.6 - 141.5)  | 149.8 (125.8 - 173.8) | 209.8 (181.4 - 238.2) | 182.4 (155.9 - 208.9) | 233.7 (203.8 - 263.7) | 67.8 (51.7 - 84.0)    | 61.9 (46.5 - 77.3)   | 73.1 (56.3 - 89.8)    |
| 2011 | 128.5 (106.3 - 150.7) | 113.5 (92.6 - 134.4)  | 141.8 (118.5 - 165.2) | 199.0 (171.4 - 226.7) | 173.4 (147.6 - 199.2) | 221.6 (192.4 - 250.7) | 63.1 (47.6 - 78.7)    | 57.4 (42.6 - 72.3)   | 68.3 (52.1 - 84.5)    |
| 2012 | 120.8 (99.3 - 142.4)  | 107.5 (87.2 - 127.9)  | 132.8 (110.2 - 155.4) | 187.6 (160.7 - 214.4) | 164.6 (139.4 - 189.7) | 207.9 (179.7 - 236.2) | 58.5 (43.5 - 73.5)    | 53.8 (39.4 - 68.1)   | 63.0 (47.4 - 78.5)    |
| 2013 | 114.8 (93.8 - 135.7)  | 103.5 (83.6 - 123.5)  | 125.0 (103.1 - 146.9) | 177.5 (151.3 - 203.6) | 158.3 (133.6 - 182.9) | 194.6 (167.2 - 221.9) | 55.8 (41.1 - 70.4)    | 51.7 (37.6 - 65.7)   | 59.7 (44.5 - 74.8)    |
| 2014 | 108.8 (88.4 - 129.3)  | 97.8 (78.4 - 117.2)   | 119.0 (97.6 - 140.4)  | 168.3 (142.9 - 193.7) | 150.0 (126.0 - 174.0) | 184.9 (158.3 - 211.6) | 52.6 (38.4 - 66.8)    | 48.3 (34.6 - 61.9)   | 56.7 (42.0 - 71.5)    |
| 2015 | 103.0 (83.1 - 122.9)  | 92.0 (73.2 - 110.8)   | 113.1 (92.3 - 134.0)  | 158.6 (133.9 - 183.3) | 140.7 (117.4 - 163.9) | 174.8 (148.9 - 200.7) | 50.2 (36.3 - 64.1)    | 45.7 (32.4 - 58.9)   | 54.5 (40.0 - 68.9)    |
| 2016 | 97.9 (78.5 - 117.3)   | 87.5 (69.2 - 105.8)   | 107.5 (87.2 - 127.9)  | 150.8 (126.7 - 174.8) | 133.7 (111.1 - 156.4) | 166.4 (141.1 - 191.7) | 47.4 (33.9 - 60.9)    | 43.5 (30.6 - 56.4)   | 51.1 (37.1 - 65.1)    |
| 2017 | 91.4 (72.7 - 110.1)   | 82.7 (64.8 - 100.5)   | 99.6 (80.1 - 119.2)   | 141.4 (118.0 - 164.7) | 127.4 (105.3 - 149.5) | 154.3 (130.0 - 178.7) | 43.3 (30.4 - 56.2)    | 40.0 (27.6 - 52.4)   | 46.5 (33.1 - 59.9)    |
| 2018 | 88.8 (70.3 - 107.3)   | 79.5 (62.0 - 96.9)    | 97.8 (78.5 - 117.2)   | 136.3 (113.4 - 159.1) | 122.2 (100.6 - 143.9) | 149.6 (125.6 - 173.5) | 42.9 (30.1 - 55.8)    | 38.6 (26.4 - 50.8)   | 47.2 (33.7 - 60.7)    |
| 2019 | 85.6 (67.5 - 103.8)   | 77.1 (59.9 - 94.4)    | 93.9 (74.9 - 112.9)   | 130.4 (108.0 - 152.8) | 116.9 (95.7 - 138.1)  | 143.2 (119.7 - 166.7) | 42.2 (29.5 - 55.0)    | 39.1 (26.8 - 51.3)   | 45.4 (32.2 - 58.6)    |

**Supplementary Table S4.** Age standardized treatable mortality rates per 100,000 persons (95% confidence interval) of metropolitan and non-metropolitan areas by sex from 1995 to 2019

| Year | Total               |                     |                     | Male                 |                      |                       | Female             |                    |                    |
|------|---------------------|---------------------|---------------------|----------------------|----------------------|-----------------------|--------------------|--------------------|--------------------|
|      | All-area            | Metropolitan        | Non-metropolitan    | All-area             | Metropolitan         | Non-metropolitan      | All-area           | Metropolitan       | Non-metropolitan   |
| 1995 | 92.4 (73.6 - 111.3) | 89.0 (70.5 - 107.5) | 95.2 (76.1 - 114.4) | 118.2 (96.9 - 139.5) | 111.3 (90.6 - 132.0) | 123.5 (101.7 - 145.3) | 73.0 (56.3 - 89.8) | 72.7 (56.0 - 89.4) | 73.7 (56.9 - 90.5) |
| 1996 | 85.6 (67.5 - 103.8) | 81.4 (63.7 - 99.0)  | 88.9 (70.4 - 107.3) | 108.2 (87.8 - 128.6) | 99.5 (79.9 - 119.0)  | 114.2 (93.3 - 135.2)  | 68.7 (52.4 - 84.9) | 67.8 (51.7 - 84.0) | 69.8 (53.4 - 86.2) |
| 1997 | 86.9 (68.6 - 105.2) | 82.6 (64.8 - 100.4) | 90.3 (71.7 - 108.9) | 110.2 (89.6 - 130.7) | 100.7 (81.0 - 120.3) | 117.1 (95.9 - 138.4)  | 69.2 (52.9 - 85.5) | 69.0 (52.7 - 85.3) | 69.7 (53.4 - 86.1) |
| 1998 | 86.2 (68.0 - 104.4) | 82.7 (64.8 - 100.5) | 89.2 (70.7 - 107.7) | 111.3 (90.6 - 131.9) | 103.4 (83.4 - 123.3) | 117.3 (96.1 - 138.6)  | 66.5 (50.5 - 82.5) | 66.4 (50.4 - 82.4) | 67.1 (51.0 - 83.1) |
| 1999 | 85.0 (66.9 - 103.0) | 81.1 (63.5 - 98.8)  | 88.2 (69.8 - 106.6) | 108.7 (88.2 - 129.1) | 101.6 (81.8 - 121.4) | 114.2 (93.3 - 135.2)  | 66.5 (50.5 - 82.5) | 65.2 (49.4 - 81.0) | 67.7 (51.6 - 83.9) |
| 2000 | 85.0 (66.9 - 103.0) | 81.8 (64.1 - 99.6)  | 87.8 (69.5 - 106.2) | 107.8 (87.4 - 128.1) | 100.5 (80.9 - 120.2) | 113.6 (92.7 - 134.5)  | 66.8 (50.8 - 82.8) | 66.7 (50.7 - 82.7) | 67.4 (51.4 - 83.5) |
| 2001 | 82.0 (64.3 - 99.8)  | 79.3 (61.8 - 96.7)  | 84.5 (66.5 - 102.5) | 105.2 (85.1 - 125.3) | 100.0 (80.4 - 119.6) | 109.6 (89.1 - 130.1)  | 63.5 (47.9 - 79.1) | 62.5 (47.0 - 78.0) | 64.6 (48.9 - 80.4) |
| 2002 | 79.4 (61.9 - 96.8)  | 76.7 (59.5 - 93.8)  | 81.9 (64.2 - 99.7)  | 99.8 (80.2 - 119.4)  | 94.8 (75.8 - 113.9)  | 104.2 (84.2 - 124.2)  | 62.8 (47.3 - 78.3) | 61.8 (46.4 - 77.2) | 63.9 (48.3 - 79.6) |
| 2003 | 73.6 (56.8 - 90.4)  | 71.2 (54.7 - 87.8)  | 75.9 (58.8 - 93.0)  | 92.7 (73.9 - 111.6)  | 88.2 (69.8 - 106.6)  | 96.8 (77.5 - 116.1)   | 57.9 (43.0 - 72.8) | 57.1 (42.3 - 72.0) | 58.8 (43.7 - 73.8) |
| 2004 | 69.7 (53.4 - 86.1)  | 67.4 (51.3 - 83.4)  | 72.1 (55.5 - 88.8)  | 87.5 (69.2 - 105.9)  | 83.4 (65.5 - 101.3)  | 91.4 (72.6 - 110.1)   | 55.1 (40.5 - 69.6) | 53.9 (39.5 - 68.3) | 56.3 (41.6 - 71.0) |
| 2005 | 64.3 (48.6 - 80.1)  | 61.7 (46.3 - 77.1)  | 66.8 (50.8 - 82.9)  | 80.8 (63.2 - 98.4)   | 76.4 (59.3 - 93.5)   | 84.7 (66.7 - 102.7)   | 50.8 (36.8 - 64.7) | 49.3 (35.6 - 63.1) | 52.1 (38.0 - 66.3) |
| 2006 | 61.1 (45.7 - 76.4)  | 58.5 (43.5 - 73.5)  | 63.4 (47.8 - 79.0)  | 77.0 (59.8 - 94.2)   | 72.9 (56.2 - 89.7)   | 80.6 (63.0 - 98.2)    | 47.6 (34.1 - 61.1) | 46.0 (32.7 - 59.3) | 49.0 (35.2 - 62.7) |
| 2007 | 57.7 (42.8 - 72.6)  | 54.4 (40.0 - 68.9)  | 60.5 (45.3 - 75.8)  | 72.2 (55.5 - 88.8)   | 66.9 (50.9 - 83.0)   | 76.7 (59.5 - 93.8)    | 45.3 (32.1 - 58.5) | 43.5 (30.6 - 56.5) | 46.9 (33.5 - 60.4) |
| 2008 | 53.4 (39.1 - 67.8)  | 49.6 (35.8 - 63.4)  | 56.8 (42.0 - 71.6)  | 67.1 (51.0 - 83.1)   | 60.9 (45.6 - 76.2)   | 72.3 (55.7 - 89.0)    | 41.8 (29.1 - 54.5) | 39.7 (27.4 - 52.1) | 43.7 (30.7 - 56.7) |
| 2009 | 49.6 (35.8 - 63.4)  | 46.1 (32.8 - 59.4)  | 52.7 (38.5 - 66.9)  | 62.0 (46.6 - 77.5)   | 56.6 (41.8 - 71.3)   | 66.7 (50.7 - 82.7)    | 38.9 (26.7 - 51.1) | 36.8 (24.9 - 48.7) | 40.8 (28.2 - 53.3) |
| 2010 | 48.4 (34.8 - 62.0)  | 45.4 (32.2 - 58.6)  | 51.0 (37.0 - 65.0)  | 60.6 (45.3 - 75.8)   | 55.7 (41.1 - 70.4)   | 64.8 (49.0 - 80.6)    | 37.8 (25.7 - 49.8) | 36.3 (24.5 - 48.1) | 39.0 (26.8 - 51.3) |
| 2011 | 46.0 (32.7 - 59.3)  | 42.8 (30.0 - 55.7)  | 48.8 (35.1 - 62.5)  | 57.7 (42.8 - 72.6)   | 52.2 (38.1 - 66.4)   | 62.3 (46.9 - 77.8)    | 35.9 (24.2 - 47.7) | 34.5 (23.0 - 46.0) | 37.2 (25.2 - 49.1) |
| 2012 | 44.9 (31.8 - 58.1)  | 41.7 (29.0 - 54.3)  | 47.8 (34.2 - 61.3)  | 56.7 (42.0 - 71.5)   | 52.2 (38.1 - 66.4)   | 60.6 (45.4 - 75.9)    | 34.5 (23.0 - 46.0) | 32.2 (21.0 - 43.3) | 36.6 (24.7 - 48.4) |
| 2013 | 42.4 (29.7 - 55.2)  | 40.0 (27.6 - 52.4)  | 44.6 (31.5 - 57.7)  | 52.6 (38.4 - 66.8)   | 48.9 (35.2 - 62.7)   | 55.8 (41.2 - 70.4)    | 33.4 (22.1 - 44.8) | 32.0 (20.9 - 43.1) | 34.8 (23.2 - 46.4) |
| 2014 | 41.1 (28.6 - 53.7)  | 38.6 (26.4 - 50.7)  | 43.5 (30.5 - 56.4)  | 51.0 (37.0 - 65.0)   | 47.2 (33.7 - 60.7)   | 54.3 (39.9 - 68.8)    | 32.3 (21.1 - 43.4) | 30.7 (19.8 - 41.5) | 33.8 (22.4 - 45.2) |
| 2015 | 40.2 (27.7 - 52.6)  | 37.4 (25.4 - 49.3)  | 42.6 (29.8 - 55.4)  | 49.9 (36.1 - 63.8)   | 46.0 (32.7 - 59.3)   | 53.4 (39.1 - 67.7)    | 31.3 (20.4 - 42.3) | 29.5 (18.9 - 40.2) | 32.9 (21.7 - 44.2) |
| 2016 | 39.1 (26.8 - 51.3)  | 36.9 (25.0 - 48.8)  | 41.1 (28.5 - 53.7)  | 48.4 (34.8 - 62.0)   | 45.3 (32.1 - 58.5)   | 51.2 (37.2 - 65.3)    | 30.6 (19.7 - 41.4) | 29.2 (18.6 - 39.8) | 31.8 (20.8 - 42.9) |
| 2017 | 36.9 (25.0 - 48.8)  | 34.0 (22.6 - 45.4)  | 39.6 (27.2 - 51.9)  | 46.2 (32.9 - 59.6)   | 42.3 (29.6 - 55.0)   | 49.8 (35.9 - 63.6)    | 28.4 (17.9 - 38.8) | 26.4 (16.3 - 36.4) | 30.2 (19.4 - 41.0) |
| 2018 | 36.1 (24.3 - 47.9)  | 33.9 (22.5 - 45.3)  | 38.1 (26.0 - 50.2)  | 45.3 (32.1 - 58.5)   | 42.4 (29.6 - 55.1)   | 48.0 (34.5 - 61.6)    | 27.5 (17.2 - 37.8) | 26.1 (16.1 - 36.1) | 28.8 (18.3 - 39.4) |
| 2019 | 34.6 (23.0 - 46.1)  | 32.5 (21.3 - 43.6)  | 36.5 (24.7 - 48.4)  | 43.1 (30.2 - 55.9)   | 40.4 (27.9 - 52.8)   | 45.5 (32.3 - 58.7)    | 26.6 (16.5 - 36.7) | 25.1 (15.3 - 34.9) | 28.1 (17.7 - 38.5) |

**Supplementary Table S5.** Absolute and relative changes of cause-specific avoidable mortality rate according to the type of areas from 1995 to 2019 in males<sup>1</sup>

| Cause group                                                         | Absolute change (per 100,000 persons) |                    |                        |           |                    |                        | Relative change (%) |                    |                        |             |                    |                        |
|---------------------------------------------------------------------|---------------------------------------|--------------------|------------------------|-----------|--------------------|------------------------|---------------------|--------------------|------------------------|-------------|--------------------|------------------------|
|                                                                     | Preventable                           |                    |                        | Treatable |                    |                        | Preventable         |                    |                        | Preventable |                    |                        |
|                                                                     | Total                                 | Metro <sup>2</sup> | Non-metro <sup>3</sup> | Total     | Metro <sup>2</sup> | Non-metro <sup>3</sup> | Total               | Metro <sup>2</sup> | Non-metro <sup>3</sup> | Total       | Metro <sup>2</sup> | Non-metro <sup>3</sup> |
| All avoidable causes of death                                       | -276.8                                | -220.7             | -315.1                 | -75.2     | -70.9              | -78.0                  | -68.0               | -65.4              | -68.8                  | -63.6       | -63.7              | -63.1                  |
| Infectious diseases                                                 | -7.2                                  | -5.5               | -8.3                   | -8.2      | -6.9               | -9.1                   | -80.0               | -76.7              | -81.2                  | -76.3       | -76.2              | -75.7                  |
| Tuberculosis                                                        | -7.6                                  | -5.7               | -8.9                   | -7.6      | -5.7               | -8.9                   | -92.4               | -90.2              | -93.4                  | -92.4       | -90.2              | -93.4                  |
| Others                                                              | 0.4                                   | 0.2                | 0.5                    | -0.6      | -1.1               | -0.2                   | 46.7                | 24.8               | 65.6                   | -24.3       | -42.7              | -9.1                   |
| Cancer                                                              | -91.9                                 | -72.9              | -103.2                 | 0.1       | -1.0               | 0.8                    | -65.9               | -62.4              | -67.0                  | 1.3         | -10.6              | 10.4                   |
| Stomach cancer <sup>4</sup>                                         | -35.9                                 | -29.3              | -39.8                  | -         | -                  | -                      | -81.9               | -80.2              | -82.3                  | -           | -                  | -                      |
| Liver cancer <sup>4</sup>                                           | -30.4                                 | -22.8              | -35.4                  | -         | -                  | -                      | -66.9               | -62.4              | -68.4                  | -           | -                  | -                      |
| Lung cancer <sup>4</sup>                                            | -19.2                                 | -16.6              | -20.4                  | -         | -                  | -                      | -50.6               | -49.2              | -50.3                  | -           | -                  | -                      |
| Colorectal cancer <sup>5</sup>                                      | -                                     | -                  | -                      | 0.1       | -1.0               | 0.8                    | -                   | -                  | -                      | 1.2         | -11.8              | 11.4                   |
| Breast cancer <sup>5 6</sup>                                        | -                                     | -                  | -                      | -         | -                  | -                      | -                   | -                  | -                      | -           | -                  | -                      |
| Cervical cancer <sup>6</sup>                                        | -                                     | -                  | -                      | -         | -                  | -                      | -                   | -                  | -                      | -           | -                  | -                      |
| Others                                                              | -6.4                                  | -4.3               | -7.7                   | 0.0       | 0.0                | 0.0                    | -52.4               | -42.5              | -57.2                  | 2.0         | 1.2                | 3.2                    |
| Endocrine and metabolic diseases                                    | -8.3                                  | -8.1               | -8.5                   | -8.5      | -8.3               | -8.7                   | -74.2               | -75.3              | -73.3                  | -74.3       | -75.6              | -73.4                  |
| Diabetes mellitus                                                   | -8.3                                  | -8.1               | -8.5                   | -8.3      | -8.1               | -8.5                   | -74.2               | -75.3              | -73.4                  | -74.2       | -75.3              | -73.4                  |
| Others <sup>5</sup>                                                 | -                                     | -                  | -                      | -0.7      | -0.4               | -0.9                   | -                   | -                  | -                      | -49.8       | -37.4              | -56.2                  |
| Diseases of the nervous system (epilepsy) <sup>5</sup>              | -                                     | -                  | -                      | -0.7      | -0.4               | -0.9                   | -                   | -                  | -                      | -49.8       | -37.4              | -56.2                  |
| Diseases of the circulatory system                                  | -47.5                                 | -44.0              | -50.0                  | -47.5     | -44.0              | -49.9                  | -77.9               | -76.8              | -78.6                  | -77.6       | -76.5              | -78.1                  |
| Ischaemic heart diseases                                            | -3.6                                  | -4.0               | -3.6                   | -3.6      | -4.0               | -3.6                   | -38.9               | -41.1              | -38.3                  | -38.9       | -41.1              | -38.3                  |
| Cerebrovascular diseases                                            | -35.4                                 | -35.6              | -35.4                  | -35.4     | -35.6              | -35.4                  | -84.3               | -84.7              | -84.0                  | -84.3       | -84.7              | -84.0                  |
| Others                                                              | -8.5                                  | -4.5               | -10.9                  | -8.5      | -4.5               | -10.9                  | -88.0               | -78.5              | -90.9                  | -85.5       | -75.8              | -88.2                  |
| Diseases of the respiratory system                                  | -4.8                                  | -6.3               | -3.9                   | -6.1      | -6.1               | -5.7                   | -57.4               | -69.8              | -47.6                  | -41.6       | -46.4              | -36.4                  |
| Chronic lower respiratory diseases <sup>4</sup>                     | -3.8                                  | -5.4               | -2.8                   | -         | -                  | -                      | -63.0               | -74.3              | -53.2                  | -           | -                  | -                      |
| Pneumonia, not elsewhere classified <sup>5</sup>                    | -                                     | -                  | -                      | 3.0       | 1.9                | 4.0                    | -                   | -                  | -                      | 66.5        | 43.5               | 84.9                   |
| Others                                                              | -1.1                                  | -0.8               | -1.1                   | -9.1      | -8.0               | -9.6                   | -43.6               | -49.9              | -37.6                  | -90.2       | -92.5              | -88.1                  |
| Diseases of the digestive system <sup>5</sup>                       | -                                     | -                  | -                      | -2.6      | -1.4               | -3.3                   | -                   | -                  | -                      | -2.6        | -1.4               | -3.3                   |
| Gastric and duodenal ulcer                                          | -                                     | -                  | -                      | -2.1      | -1.0               | -2.7                   | -                   | -                  | -                      | -2.1        | -1.0               | -2.7                   |
| Others                                                              | -                                     | -                  | -                      | -0.5      | -0.4               | -0.6                   | -                   | -                  | -                      | -0.5        | -0.4               | -0.6                   |
| Diseases of the genitourinary system <sup>5</sup>                   | -                                     | -                  | -                      | -1.7      | -3.2               | -0.9                   | -                   | -                  | -                      | -35.9       | -52.0              | -21.5                  |
| Renal failure                                                       | -                                     | -                  | -                      | -1.3      | -2.8               | -0.4                   | -                   | -                  | -                      | -29.9       | -49.4              | -11.6                  |
| Others                                                              | -                                     | -                  | -                      | -0.4      | -0.4               | -0.5                   | -                   | -                  | -                      | -89.8       | -90.4              | -88.6                  |
| Diseases of pregnancy, childbirth, and perinatal period             | 0.0                                   | 0.0                | 0.0                    | 0.8       | 0.9                | 0.7                    | 0.0                 | 0.0                | 0.0                    | 193.3       | 317.1              | 129.5                  |
| Certain conditions originating in the perinatal period <sup>5</sup> | -                                     | -                  | -                      | 0.8       | 0.9                | 0.7                    | -                   | -                  | -                      | 193.3       | 317.1              | 129.5                  |
| Others                                                              | 0.0                                   | 0.0                | 0.0                    | 0.0       | 0.0                | 0.0                    | 0.0                 | 0.0                | 0.0                    | 0.0         | 0.0                | 0.0                    |
| Congenital malformations                                            | 0.0                                   | 0.0                | 0.0                    | -0.8      | -0.6               | -0.9                   | -45.2               | -26.5              | -100.0                 | -71.7       | -64.2              | -77.3                  |
| Congenital malformations of the circulatory system <sup>5</sup>     | -                                     | -                  | -                      | -0.8      | -0.6               | -0.9                   | -                   | -                  | -                      | -71.7       | -64.2              | -77.3                  |
| Others <sup>4</sup>                                                 | 0.0                                   | 0.0                | 0.0                    | -         | -                  | -                      | -45.2               | -26.5              | -100.0                 | -           | -                  | -                      |
| Adverse effects of medical and surgical care <sup>5</sup>           | -                                     | -                  | -                      | 0.0       | 0.1                | -0.1                   | -                   | -                  | -                      | 22.5        | 217.5              | -31.3                  |
| Misadventures to patients during surgical and medical care          | -                                     | -                  | -                      | 0.0       | 0.2                | -0.1                   | -                   | -                  | -                      | 38.1        | 695.8              | -42.5                  |
| Others                                                              | -                                     | -                  | -                      | 0.0       | 0.0                | 0.0                    | -                   | -                  | -                      | -37.6       | -100.0             | 42.8                   |
| Injuries <sup>4</sup>                                               | -66.7                                 | -49.7              | -79.2                  | -         | -                  | -                      | -58.7               | -55.8              | -59.3                  | -           | -                  | -                      |
| Transport Accidents                                                 | -52.6                                 | -35.6              | -65.5                  | -         | -                  | -                      | -87.1               | -86.6              | -86.9                  | -           | -                  | -                      |
| Intentional self-harm                                               | 12.6                                  | 8.9                | 15.7                   | -         | -                  | -                      | 79.8                | 54.5               | 98.7                   | -           | -                  | -                      |
| Others                                                              | -26.7                                 | -23.0              | -29.4                  | -         | -                  | -                      | -71.3               | -72.8              | -69.7                  | -           | -                  | -                      |
| Alcohol related and drug-related deaths <sup>4</sup>                | -50.4                                 | -34.1              | -61.9                  | -         | -                  | -                      | -78.0               | -71.9              | -80.4                  | -           | -                  | -                      |
| Alcohol specific disorders and poisonings                           | -3.6                                  | -1.9               | -4.8                   | -         | -                  | -                      | -24.9               | -15.3              | -29.8                  | -           | -                  | -                      |
| Others                                                              | -46.7                                 | -32.2              | -57.1                  | -         | -                  | -                      | -93.4               | -92.2              | -93.7                  | -           | -                  | -                      |

<sup>1</sup> Absolute change = mortality in 1995 – mortality in 2019; relative change (ratio) = (mortality in 1995 – mortality in 2019) / mortality in 1995 × 100; <sup>2</sup> metro: metropolitan area; <sup>3</sup> non-metro: non-metropolitan area; <sup>4</sup> only included in the category of preventable death; <sup>5</sup> only included in the category of treatable death; <sup>6</sup> values for female subjects only

**Supplementary Table S6.** Absolute and relative changes of cause-specific avoidable mortality rate according to the type of areas from 1995 to 2019 in females<sup>1</sup>

| Cause group                                                         | Absolute change (per 100,000 persons) |                    |                        |           |                    |                        | Relative change (%) |                    |                        |             |                    |                        |
|---------------------------------------------------------------------|---------------------------------------|--------------------|------------------------|-----------|--------------------|------------------------|---------------------|--------------------|------------------------|-------------|--------------------|------------------------|
|                                                                     | Preventable                           |                    |                        | Treatable |                    |                        | Preventable         |                    |                        | Preventable |                    |                        |
|                                                                     | Total                                 | Metro <sup>2</sup> | Non-metro <sup>3</sup> | Total     | Metro <sup>2</sup> | Non-metro <sup>3</sup> | Total               | Metro <sup>2</sup> | Non-metro <sup>3</sup> | Total       | Metro <sup>2</sup> | Non-metro <sup>3</sup> |
| All avoidable causes of death                                       | -89.6                                 | -81.6              | -94.8                  | -46.4     | -47.6              | -45.6                  | -68.0               | -67.6              | -67.6                  | -63.5       | -65.4              | -61.9                  |
| Infectious diseases                                                 | -1.6                                  | -1.4               | -1.7                   | -1.7      | -1.8               | -1.7                   | -74.8               | -75.5              | -73.7                  | -58.3       | -64.3              | -54.1                  |
| Tuberculosis                                                        | -1.6                                  | -1.2               | -1.8                   | -1.6      | -1.2               | -1.8                   | -92.4               | -91.0              | -93.0                  | -92.4       | -91.0              | -93.0                  |
| Others                                                              | 0.0                                   | -0.1               | 0.1                    | -0.1      | -0.5               | 0.1                    | 3.2                 | -25.0              | 28.0                   | -11.0       | -38.4              | 12.5                   |
| Cancer                                                              | -25.1                                 | -21.7              | -27.2                  | -3.0      | -4.0               | -2.5                   | -64.6               | -61.9              | -65.8                  | -18.9       | -23.3              | -16.4                  |
| Stomach cancer <sup>4</sup>                                         | -13.7                                 | -11.3              | -15.2                  | -         | -                  | -                      | -80.6               | -78.0              | -81.7                  | -           | -                  | -                      |
| Liver cancer <sup>4</sup>                                           | -6.9                                  | -6.1               | -7.4                   | -         | -                  | -                      | -67.6               | -66.6              | -67.7                  | -           | -                  | -                      |
| Lung cancer <sup>4</sup>                                            | -3.4                                  | -3.1               | -3.6                   | -         | -                  | -                      | -39.4               | -37.3              | -40.9                  | -           | -                  | -                      |
| Colorectal cancer <sup>5</sup>                                      | -                                     | -                  | -                      | -1.1      | -1.6               | -0.8                   | -                   | -                  | -                      | -22.1       | -29.6              | -16.0                  |
| Breast cancer <sup>5 6</sup>                                        | -                                     | -                  | -                      | 1.9       | 1.5                | 2.0                    | -                   | -                  | -                      | 41.4        | 29.0               | 48.5                   |
| Cervical cancer <sup>6</sup>                                        | -0.5                                  | -0.9               | -0.2                   | -0.5      | -0.9               | -0.2                   | -33.7               | -51.1              | -14.5                  | -33.7       | -51.1              | -14.5                  |
| Others                                                              | -0.6                                  | -0.4               | -0.8                   | -3.3      | -3.0               | -3.5                   | -36.8               | -25.0              | -44.0                  | -67.3       | -63.7              | -70.3                  |
| Endocrine and metabolic diseases                                    | -5.6                                  | -6.4               | -5.0                   | -5.9      | -6.7               | -5.4                   | -84.2               | -88.5              | -80.3                  | -84.0       | -88.3              | -80.1                  |
| Diabetes mellitus                                                   | -5.5                                  | -6.4               | -5.0                   | -5.5      | -6.4               | -5.0                   | -84.0               | -88.4              | -80.0                  | -84.0       | -88.4              | -80.0                  |
| Others <sup>5</sup>                                                 | -                                     | -                  | -                      | -0.5      | -0.2               | -0.7                   | -                   | -                  | -                      | -57.7       | -29.5              | -69.3                  |
| Diseases of the nervous system (epilepsy) <sup>5</sup>              | -                                     | -                  | -                      | -0.5      | -0.2               | -0.7                   | -                   | -                  | -                      | -57.7       | -29.5              | -69.3                  |
| Diseases of the circulatory system                                  | -30.0                                 | -29.1              | -30.5                  | -30.0     | -29.1              | -30.4                  | -86.3               | -87.2              | -85.4                  | -85.8       | -86.7              | -84.8                  |
| Ischaemic heart diseases                                            | -2.2                                  | -2.5               | -2.0                   | -2.2      | -2.5               | -2.0                   | -64.7               | -70.1              | -59.9                  | -64.7       | -70.1              | -59.9                  |
| Cerebrovascular diseases                                            | -22.6                                 | -23.5              | -21.9                  | -22.6     | -23.5              | -21.9                  | -88.0               | -89.5              | -86.6                  | -88.0       | -89.5              | -86.6                  |
| Others                                                              | -5.2                                  | -3.0               | -6.6                   | -5.2      | -3.0               | -6.5                   | -92.1               | -87.4              | -93.5                  | -88.6       | -82.9              | -90.2                  |
| Diseases of the respiratory system                                  | -1.5                                  | -2.0               | -1.2                   | -2.9      | -3.0               | -2.8                   | -66.9               | -75.2              | -59.0                  | -50.6       | -56.0              | -46.3                  |
| Chronic lower respiratory diseases <sup>4</sup>                     | -1.5                                  | -1.9               | -1.3                   | -         | -                  | -                      | -80.0               | -83.5              | -77.2                  | -           | -                  | -                      |
| Pneumonia, not elsewhere classified <sup>5</sup>                    | -                                     | -                  | -                      | 0.6       | 0.1                | 0.9                    | -                   | -                  | -                      | 32.1        | 4.0                | 51.1                   |
| Others                                                              | 0.0                                   | -0.1               | 0.1                    | -3.5      | -3.1               | -3.8                   | 5.4                 | -23.7              | 29.1                   | -89.2       | -90.7              | -87.7                  |
| Diseases of the digestive system <sup>5</sup>                       | -                                     | -                  | -                      | -1.0      | -0.8               | -1.1                   | -                   | -                  | -                      | -73.9       | -75.0              | -71.5                  |
| Gastric and duodenal ulcer                                          | -                                     | -                  | -                      | -0.6      | -0.4               | -0.7                   | -                   | -                  | -                      | -88.4       | -83.1              | -90.8                  |
| Others                                                              | -                                     | -                  | -                      | -0.5      | -0.4               | -0.4                   | -                   | -                  | -                      | -61.1       | -68.2              | -54.2                  |
| Diseases of the genitourinary system <sup>5</sup>                   | -                                     | -                  | -                      | -1.4      | -2.0               | -1.1                   | -                   | -                  | -                      | -47.3       | -57.6              | -38.5                  |
| Renal failure                                                       | -                                     | -                  | -                      | -1.1      | -1.7               | -0.7                   | -                   | -                  | -                      | -41.0       | -54.0              | -29.3                  |
| Others                                                              | -                                     | -                  | -                      | -0.4      | -0.3               | -0.4                   | -                   | -                  | -                      | -87.8       | -89.0              | -86.7                  |
| Diseases of pregnancy, childbirth, and perinatal period             | 0.0                                   | 0.0                | 0.0                    | 0.7       | 0.7                | 0.7                    | 0.0                 | 0.0                | 0.0                    | 232.7       | 252.5              | 218.6                  |
| Certain conditions originating in the perinatal period <sup>5</sup> | -                                     | -                  | -                      | 0.7       | 0.7                | 0.8                    | -                   | -                  | -                      | 254.2       | 263.6              | 247.2                  |
| Others                                                              | 0.0                                   | 0.0                | 0.0                    | 0.0       | 0.0                | 0.0                    | 0.0                 | 0.0                | 0.0                    | -76.3       | -100.0             | -68.1                  |
| Congenital malformations                                            | 0.0                                   | 0.0                | 0.0                    | -0.7      | -0.8               | -0.7                   | 276.1               | 73.7               | 484.3                  | -70.2       | -81.0              | -60.6                  |
| Congenital malformations of the circulatory system <sup>5</sup>     | -                                     | -                  | -                      | -0.7      | -0.8               | -0.7                   | -                   | -                  | -                      | -70.2       | -81.0              | -60.6                  |
| Others <sup>4</sup>                                                 | 0.0                                   | 0.0                | 0.0                    | -         | -                  | -                      | 276.1               | 73.7               | 484.3                  | -           | -                  | -                      |
| Adverse effects of medical and surgical care <sup>5</sup>           | -                                     | -                  | -                      | 0.0       | 0.1                | 0.0                    | -                   | -                  | -                      | 46.0        | 126.5              | -10.2                  |
| Misadventures to patients during surgical and medical care          | -                                     | -                  | -                      | 0.0       | 0.1                | 0.0                    | -                   | -                  | -                      | 152.6       | 426.5              | 38.4                   |
| Others                                                              | -                                     | -                  | -                      | 0.0       | 0.0                | 0.0                    | -                   | -                  | -                      | -52.9       | -51.8              | -61.7                  |
| Injuries <sup>4</sup>                                               | -19.9                                 | -15.4              | -23.0                  | -         | -                  | -                      | -53.1               | -48.9              | -54.6                  | -           | -                  | -                      |
| Transport Accidents                                                 | -17.3                                 | -12.1              | -21.0                  | -         | -                  | -                      | -89.9               | -90.2              | -89.3                  | -           | -                  | -                      |
| Intentional self-harm                                               | 6.3                                   | 6.1                | 6.4                    | -         | -                  | -                      | 98.8                | 99.0               | 95.1                   | -           | -                  | -                      |
| Others                                                              | -8.9                                  | -9.3               | -8.5                   | -         | -                  | -                      | -74.9               | -78.5              | -71.3                  | -           | -                  | -                      |
| Alcohol related and drug-related deaths <sup>4</sup>                | -6.0                                  | -5.6               | -6.2                   | -         | -                  | -                      | -61.3               | -62.3              | -59.4                  | -           | -                  | -                      |
| Alcohol specific disorders and poisonings                           | 1.4                                   | 1.3                | 1.6                    | -         | -                  | -                      | 217.7               | 229.3              | 218.6                  | -           | -                  | -                      |
| Others                                                              | -7.4                                  | -6.9               | -7.8                   | -         | -                  | -                      | -81.3               | -81.8              | -80.6                  | -           | -                  | -                      |

<sup>1</sup> Absolute change = mortality in 1995 – mortality in 2019; relative change (ratio) = (mortality in 1995 – mortality in 2019) / mortality in 1995 × 100; <sup>2</sup> metro: metropolitan area; <sup>3</sup> non-metro: non-metropolitan area; <sup>4</sup> only included in the category of preventable death; <sup>5</sup> only included in the category of treatable death; <sup>6</sup> values for female subjects only

**Supplementary Table S7.** Absolute and relative differences of all-cause and avoidable mortality between metropolitan and non-metropolitan areas from 1995 to 2019

| Year | All-cause death     |        |        |                     |      |        | Avoidable death     |        |        |                     |      |        |
|------|---------------------|--------|--------|---------------------|------|--------|---------------------|--------|--------|---------------------|------|--------|
|      | Absolute difference |        |        | Relative difference |      |        | Absolute difference |        |        | Relative difference |      |        |
|      | Total               | Male   | Female | Total               | Male | Female | Total               | Male   | Female | Total               | Male | Female |
| 1995 | 132.00              | 236.90 | 54.80  | 1.20                | 1.27 | 1.11   | 72.66               | 132.75 | 20.45  | 1.24                | 1.30 | 1.11   |
| 1996 | 117.24              | 208.67 | 49.21  | 1.18                | 1.24 | 1.10   | 71.77               | 128.15 | 23.84  | 1.25                | 1.30 | 1.13   |
| 1997 | 121.24              | 216.17 | 52.02  | 1.19                | 1.26 | 1.11   | 69.90               | 127.14 | 21.53  | 1.24                | 1.31 | 1.12   |
| 1998 | 106.38              | 193.35 | 43.32  | 1.17                | 1.23 | 1.09   | 64.79               | 118.80 | 19.64  | 1.24                | 1.30 | 1.12   |
| 1999 | 110.35              | 191.62 | 52.15  | 1.18                | 1.24 | 1.12   | 62.01               | 109.30 | 22.37  | 1.23                | 1.28 | 1.14   |
| 2000 | 94.13               | 174.76 | 39.05  | 1.16                | 1.22 | 1.09   | 55.05               | 101.42 | 17.63  | 1.21                | 1.27 | 1.11   |
| 2001 | 86.27               | 155.07 | 38.54  | 1.15                | 1.21 | 1.09   | 52.12               | 93.14  | 19.91  | 1.21                | 1.25 | 1.13   |
| 2002 | 83.60               | 151.84 | 38.06  | 1.15                | 1.21 | 1.09   | 53.67               | 95.43  | 20.67  | 1.22                | 1.27 | 1.14   |
| 2003 | 87.08               | 149.87 | 43.97  | 1.17                | 1.22 | 1.11   | 52.75               | 92.00  | 21.51  | 1.22                | 1.27 | 1.15   |
| 2004 | 76.63               | 137.64 | 34.73  | 1.15                | 1.21 | 1.09   | 47.89               | 86.12  | 17.49  | 1.21                | 1.26 | 1.13   |
| 2005 | 68.05               | 116.70 | 34.77  | 1.14                | 1.18 | 1.10   | 41.27               | 73.55  | 15.86  | 1.19                | 1.24 | 1.12   |
| 2006 | 65.65               | 115.98 | 32.15  | 1.14                | 1.19 | 1.09   | 40.55               | 70.60  | 16.57  | 1.20                | 1.24 | 1.14   |
| 2007 | 65.30               | 110.43 | 33.47  | 1.15                | 1.18 | 1.10   | 43.50               | 75.45  | 17.21  | 1.23                | 1.28 | 1.15   |
| 2008 | 70.11               | 120.04 | 35.21  | 1.17                | 1.21 | 1.11   | 43.18               | 73.89  | 17.40  | 1.25                | 1.29 | 1.16   |
| 2009 | 63.62               | 105.76 | 34.60  | 1.16                | 1.19 | 1.12   | 39.53               | 65.61  | 17.45  | 1.23                | 1.27 | 1.17   |
| 2010 | 57.93               | 101.90 | 27.91  | 1.14                | 1.19 | 1.10   | 35.34               | 60.39  | 13.87  | 1.21                | 1.25 | 1.14   |
| 2011 | 54.55               | 95.81  | 26.63  | 1.14                | 1.18 | 1.10   | 34.30               | 58.30  | 13.58  | 1.22                | 1.26 | 1.15   |
| 2012 | 52.58               | 89.73  | 27.46  | 1.14                | 1.17 | 1.10   | 31.37               | 51.73  | 13.61  | 1.21                | 1.24 | 1.16   |
| 2013 | 45.19               | 81.79  | 20.94  | 1.12                | 1.17 | 1.08   | 26.00               | 43.15  | 10.85  | 1.18                | 1.21 | 1.13   |
| 2014 | 43.28               | 78.49  | 19.89  | 1.12                | 1.17 | 1.08   | 26.12               | 42.07  | 11.58  | 1.19                | 1.21 | 1.15   |
| 2015 | 47.29               | 80.57  | 24.80  | 1.14                | 1.18 | 1.10   | 26.40               | 41.55  | 12.22  | 1.20                | 1.22 | 1.16   |
| 2016 | 41.42               | 74.51  | 18.33  | 1.13                | 1.17 | 1.08   | 24.29               | 38.58  | 10.22  | 1.20                | 1.22 | 1.14   |
| 2017 | 45.06               | 73.67  | 24.47  | 1.14                | 1.18 | 1.11   | 22.56               | 34.42  | 10.31  | 1.19                | 1.20 | 1.16   |
| 2018 | 42.36               | 68.28  | 23.74  | 1.13                | 1.16 | 1.10   | 22.58               | 33.03  | 11.30  | 1.20                | 1.20 | 1.17   |
| 2019 | 42.45               | 66.92  | 23.95  | 1.14                | 1.17 | 1.11   | 20.83               | 31.39  | 9.25   | 1.19                | 1.20 | 1.14   |

**Supplementary Table S8.** Absolute and relative differences of preventable and treatable mortality between metropolitan and non-metropolitan areas from 1995 to 2019

| Year | Preventable death   |        |        |                     |      |        | Treatable death     |       |        |                     |      |        |
|------|---------------------|--------|--------|---------------------|------|--------|---------------------|-------|--------|---------------------|------|--------|
|      | Absolute difference |        |        | Relative difference |      |        | Absolute difference |       |        | Relative difference |      |        |
|      | Total               | Male   | Female | Total               | Male | Female | Total               | Male  | Female | Total               | Male | Female |
| 1995 | 66.44               | 120.59 | 19.41  | 1.30                | 1.36 | 1.16   | 6.22                | 12.16 | 1.04   | 1.07                | 1.11 | 1.01   |
| 1996 | 64.27               | 113.41 | 21.87  | 1.31                | 1.35 | 1.20   | 7.50                | 14.74 | 1.97   | 1.09                | 1.15 | 1.03   |
| 1997 | 62.21               | 110.64 | 20.83  | 1.30                | 1.35 | 1.19   | 7.69                | 16.49 | 0.70   | 1.09                | 1.16 | 1.01   |
| 1998 | 58.26               | 104.83 | 18.98  | 1.30                | 1.35 | 1.18   | 6.53                | 13.97 | 0.66   | 1.08                | 1.14 | 1.01   |
| 1999 | 54.96               | 96.68  | 19.84  | 1.30                | 1.34 | 1.20   | 7.05                | 12.61 | 2.54   | 1.09                | 1.12 | 1.04   |
| 2000 | 49.05               | 88.37  | 16.87  | 1.27                | 1.31 | 1.17   | 6.00                | 13.05 | 0.76   | 1.07                | 1.13 | 1.01   |
| 2001 | 46.89               | 83.56  | 17.83  | 1.27                | 1.31 | 1.20   | 5.23                | 9.58  | 2.08   | 1.07                | 1.10 | 1.03   |
| 2002 | 48.42               | 86.10  | 18.53  | 1.28                | 1.33 | 1.21   | 5.25                | 9.33  | 2.14   | 1.07                | 1.10 | 1.03   |
| 2003 | 48.08               | 83.38  | 19.90  | 1.29                | 1.32 | 1.23   | 4.67                | 8.63  | 1.61   | 1.07                | 1.10 | 1.03   |
| 2004 | 43.14               | 78.14  | 15.11  | 1.27                | 1.32 | 1.18   | 4.76                | 7.98  | 2.38   | 1.07                | 1.10 | 1.04   |
| 2005 | 36.11               | 65.25  | 13.08  | 1.24                | 1.28 | 1.16   | 5.16                | 8.30  | 2.78   | 1.08                | 1.11 | 1.06   |
| 2006 | 35.65               | 62.94  | 13.64  | 1.25                | 1.29 | 1.19   | 4.90                | 7.67  | 2.92   | 1.08                | 1.11 | 1.06   |
| 2007 | 37.38               | 65.71  | 13.80  | 1.28                | 1.32 | 1.20   | 6.12                | 9.73  | 3.41   | 1.11                | 1.15 | 1.08   |
| 2008 | 35.94               | 62.51  | 13.40  | 1.28                | 1.33 | 1.20   | 7.24                | 11.38 | 4.00   | 1.15                | 1.19 | 1.10   |
| 2009 | 32.86               | 55.44  | 13.54  | 1.26                | 1.29 | 1.21   | 6.66                | 10.16 | 3.92   | 1.14                | 1.18 | 1.11   |
| 2010 | 29.78               | 51.33  | 11.19  | 1.25                | 1.28 | 1.18   | 5.56                | 9.06  | 2.69   | 1.12                | 1.16 | 1.07   |
| 2011 | 28.32               | 48.17  | 10.92  | 1.25                | 1.28 | 1.19   | 5.98                | 10.13 | 2.66   | 1.14                | 1.19 | 1.08   |
| 2012 | 25.27               | 43.35  | 9.19   | 1.23                | 1.26 | 1.17   | 6.10                | 8.37  | 4.41   | 1.15                | 1.16 | 1.14   |
| 2013 | 21.43               | 36.29  | 8.01   | 1.21                | 1.23 | 1.16   | 4.57                | 6.86  | 2.84   | 1.11                | 1.14 | 1.09   |
| 2014 | 21.22               | 34.92  | 8.46   | 1.22                | 1.23 | 1.18   | 4.90                | 7.15  | 3.12   | 1.13                | 1.15 | 1.10   |
| 2015 | 21.14               | 34.10  | 8.78   | 1.23                | 1.24 | 1.19   | 5.26                | 7.45  | 3.44   | 1.14                | 1.16 | 1.12   |
| 2016 | 20.06               | 32.65  | 7.55   | 1.23                | 1.24 | 1.17   | 4.23                | 5.92  | 2.68   | 1.11                | 1.13 | 1.09   |
| 2017 | 16.98               | 26.96  | 6.48   | 1.21                | 1.21 | 1.16   | 5.58                | 7.47  | 3.83   | 1.16                | 1.18 | 1.15   |
| 2018 | 18.38               | 27.36  | 8.57   | 1.23                | 1.22 | 1.22   | 4.19                | 5.67  | 2.72   | 1.12                | 1.13 | 1.10   |
| 2019 | 16.76               | 26.26  | 6.29   | 1.22                | 1.22 | 1.16   | 4.08                | 5.13  | 2.96   | 1.13                | 1.13 | 1.12   |
